# Supplementary material for: Band structure and near infrared quantum cutting investigation of GdF3:Yb3+, Ln3+ (Ln = Ho, Tm, Er, Pr, Tb) nanoparticles
Source: Royal Society of Chemistry journal article supplement (doi:10.1039/c3cp51816g), 2013-01-01
Supplement: c3cp51816g.pdf [file c3cp51816g.pdf]

**Supporting information**

**Band structure and Near infrared quantum cutting investigation of  $\text{GdF}_3\text{:Yb}^{3+}$ ,  $\text{Ln}^{3+}$   
( $\text{Ln}=\text{Ho}$ ,  $\text{Tm}$ ,  $\text{Er}$ ,  $\text{Pr}$ ,  $\text{Tb}$ ) nanoparticles**

**Linna Guo, Yuhua Wang\*, Wei Zeng, Lei zhao and Lili Han**

*Department of Materials Science, School of Physical Science and Technology, Lanzhou University,*

*Lanzhou, 730000, People's Republic of China*

\* Corresponding author. Tel.: +86 931 8912772.

Fax: +86 931 8913554.

E-mail address: wyh@lzu.edu.cn. (Y.H. Wang).

The ICP-AES results of a series of samples with different kinds of doping  $\text{Ln}^{3+}$  ions are shown in the following Table 1. It can be seen from the table that the molar ratio of Gd, Yb and Ho (Er /Tm/Pr/Tb) in  $\text{GdF}_3:10\% \text{Yb}, 0.5\% \text{Ho}$  (Er /Tm/Pr/Tb) is very close to the theoretical value.

Table 1 ICP-AES results of a series of samples with different kinds of doping  $\text{Ln}^{3+}$  ions

| Gd: 10%Yb: 0.5%Ln<br>(Ln=Ho,Tm,Er,Pr,Tb) | Gd/Yb/Ho          | Gd/Yb/Tm          | Gd/Yb/Er           | Gd/Yb/Pr           | Gd/Yb/Tb            |
|------------------------------------------|-------------------|-------------------|--------------------|--------------------|---------------------|
| Measured Mass ratio                      | 62.8%/6.81%/0.32% | 50.75%/6.3%/0.25% | 51.28%/6.31%/0.42% | 52.19%/6.5%/0.279% | 50.28%/6.35%/0.311% |
| Measured molar ratio                     | 100:9.85:0.485    | 100:11.27:0.45    | 100:11.2:0.76      | 100:11.38:0.6      | 100:11.48:0.612     |
| Theoretical molar ratio                  | 100:11.17:0.56    | 100:11.17:0.56    | 100:11.17:0.56     | 100:11.17:0.56     | 100:11.17:0.56      |

Fig. S1 shows SEM images of a series of samples with different concentrations of  $\text{Yb}^{3+}$  ions. It can be seen that the morphology and size hardly change with increasing  $\text{Yb}^{3+}$  concentration.

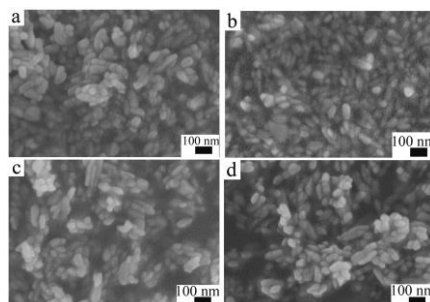

Fig. S1 SEM images of  $\text{GdF}_3:0.5\% \text{Ho}^{3+}, x\% \text{Yb}^{3+}$  ( $0 \leq x \leq 15$ ) nanoparticles:  $x=0$  (a);  $x=5$  (b);  $x=10$  (c);  $x=15$  (d)

The impurity contents of a series of  $\text{GdF}_3:0.5\% \text{Ho}^{3+}, x\% \text{Yb}^{3+}$  ( $0 \leq x \leq 15$ ) nanoparticles were characterized by Fourier-transform infrared (FT-IR) spectra, as shown in the following Fig. S2. It is found that the spectra shape of these samples with different concentrations of  $\text{Yb}^{3+}$  from 0 to 15% are nearly identical, and the absorption intensity of the surface contaminants OH groups ( $\sim 3410 \text{cm}^{-1}$ ) and CO groups ( $\sim 1641 \text{cm}^{-1}$ ) were measured to be the same basically with increasing concentrations of  $\text{Yb}^{3+}$ .

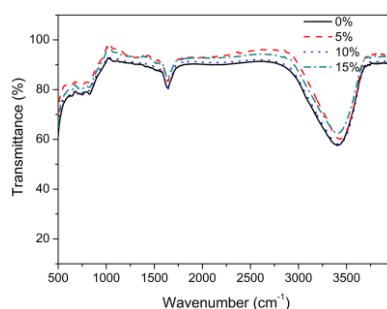

Fig. S2 FT-IR spectra of  $\text{GdF}_3:0.5\% \text{Ho}^{3+}, x\% \text{Yb}^{3+}$  ( $0 \leq x \leq 15$ ) nanoparticles

Fig.S3 shows decay curves of  $\text{Ho}^{3+}$  for  ${}^5\text{F}_5 \rightarrow {}^5\text{I}_8$  emission under excitation of 448 nm. It can be seen that the decay time of  $\text{Ho}^{3+}:{}^5\text{F}_5$  state quickly decreases from  $78.4\mu\text{s}$  to  $6.2\mu\text{s}$  with the concentration of  $\text{Yb}^{3+}$  increasing from 0% to 20%.

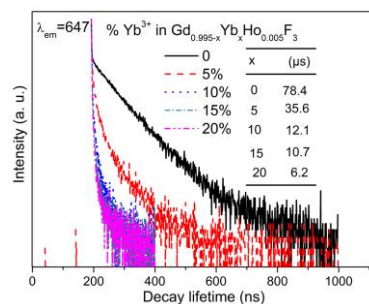

Fig. S3 Decay curves of  $\text{Ho}^{3+}$  for  ${}^5\text{F}_5 \rightarrow {}^5\text{I}_8$  emission under excitation of 448 nm
